# Supplementary material for: Association of lymphopenia and RDW elevation with risk of mortality in acute aortic dissection
Source: PLoS One. 2023 Mar 15;18(3):e0283008. doi: 10.1371/journal.pone.0283008 (PMC10016706; doi:10.1371/journal.pone.0283008)
Supplement: S5 Table — (DOCX) [file pone.0283008.s006.docx]

RESEARCH ARTICLE

**Association of Lymphopenia and RDW Elevation with Risk of Mortality in Acute Aortic Dissection**

Dan Yu1,2,3, Peng Chen1, Xueyan Zhang4, Hongjie Wang1,2, Menaka Dhuromsingh1,2, Jinxiu Wu6, Bingyu Qin4*, Suping Guo3,5*, Baoquan Zhang6*, Chunwen Li7*, Hesong Zeng1,2*

1Division of Cardiology, Department of Internal Medicine, Tongji Hospital, Tongji Medical College, Huazhong University of Science and Technology, Wuhan, 430030, China

2Hubei Provincial Engineering Research Center of Vascular Interventional Therapy, Wuhan, 430030, China

3Department of Cardiac Intensive Care Unit, People’s Hospital of Zhengzhou University (Henan Provincial People's Hospital), Zhengzhou, 450003, China

4Department of Critical Care Medicine, Henan Key Laboratory for Critical Care Medicine, People’s Hospital of Zhengzhou University (Henan Provincial People's Hospital), Zhengzhou, 450003, China

5Department of Cardiac Intensive Care Unit, Central China Fuwai Hospital of Zhengzhou University (Fuwai Central China Cardiovascular Hospital), Zhengzhou, 450046, China

6Department of Critical Care Medicine, The Third Affiliated Hospital of Xinxiang Medical University, Xinxiang, 453000, China

7Department of Emergency Medicine, The Second Affiliated Hospital of Chongqing Medical University, Chongqing, 400010, China

***** Corresponding authornicolasby@126.com (BYQ); gsp389@126.com (SPG); Zhang pzbaoq@163.com (BQZ); chunwenli@cqmu.edu.cn (CWL); zenghs@tjh.tjmu.edu.cn (HSZ)

**S5 Table.** **Associations of Lymphocyte Percentage and RDW level with Risk of In-Hospital Mortality (propensity score–matched population)**

|  | Quintiles of the exposure | | | | |  |  |
| --- | --- | --- | --- | --- | --- | --- | --- |
|  | Q1 | Q2 | Q3 | Q4 | Q5 | *P* trend | Per SD increment |
| Lymphocyte percentage, % | ≤ 4.60 | 4.61-6.30 | 6.40-8.30 | 8.40-12.1 | ≥ 12.2 |  |  |
| Deaths/N | 89/166 | 90/164 | 85/163 | 78/168 | 72/167 |  |  |
| crude model | 1 (reference) | 1.16 (0.86-1.55) | 1.00 (0.74-1.35) | 0.86 (0.64-1.17) | 0.77 (0.57-1.05) | 0.0171 | 0.83 (0.74-0.93) |
| model 1 | 1 (reference) | 1.14 (0.85-1.53) | 0.99 (0.74-1.34) | 0.86 (0.63-1.17) | 0.78 (0.57-1.06) | 0.0217 | 0.83 (0.74-0.94) |
| model 2 | 1 (reference) | 1.12 (0.83-1.51) | 0.99 (0.73-1.35) | 0.85 (0.62-1.16) | 0.76 (0.54-1.06) | 0.0257 | 0.81 (0.71-0.92) |
| RDW,fL | ≤ 41.2 | 41.3-42.9 | 43.0-44.4 | 44.5-46.9 | ≥ 47.0 |  |  |
| Deaths/N | 71/164 | 78/160 | 83/173 | 92/158 | 90/173 |  |  |
| crude model | 1 (reference) | 1.24 (0.90-1.71) | 1.23 (0.90-1.69) | 1.61 (1.18-2.19) | 1.40 (1.02-1.91) | 0.0158 | 1.06 (0.97-1.16) |
| model 1 | 1 (reference) | 1.20 (0.87-1.66) | 1.17 (0.85-1.61) | 1.56 (1.11-2.08) | 1.30 (0.95-1.79) | 0.0599 | 1.04 (0.95-1.13) |
| model 2 | 1 (reference) | 1.23 (0.88-1.71) | 1.20 (0.86-1.66) | 1.55 (1.12-2.14) | 1.34(0.97-1.86) | 0.0518 | 1.04 (0.95-1.14) |

Data was represented as numbers and HR (95% CI).

Model 1: adjusted for age (continuous) and sex.

Model 2: adjusted for model 1 plus smoking history, hypertension history, diabetes history, aortic valve replacement history, anatomical classification, etiology, aorta diameter, onset time and hospital centers.
